# Supplementary material for: Metabolomics analysis of buck semen cryopreserved with trehalose
Source: Frontiers journal article supplement (doi:10.3389/fgene.2022.938622), 2022-08-04
Supplement: Table_2.XLS [file Table_2.XLS]

## Sheet: Sheet1
Metabolite name	Kegg ID	Total similarity	HMDB	Sub Class	VIP	P-value
Glycolic acid	C03547	991.284	HMDB0000115	Alpha hydroxy acids and derivatives	1.82203	1.00377e-13
Allantoic acid	C00499	789.31	HMDB0001209	Amino acids, peptides, and analogues	1.81426	6.94178e-12
L-leucine	C00123	764.542	HMDB0000687	Amino acids, peptides, and analogues	1.81364	2.26283e-10
N-acetylornithine	C00437	870.656	HMDB0003357	Amino acids, peptides, and analogues	1.81166	1.36697e-11
N-acetylputrescine	C02714	892.228	HMDB0002064	Carboximidic acids	1.808	7.28794e-12
3-hydroxypropionic acid	C01013	965.027	HMDB0000700	Beta hydroxy acids and derivatives	1.79524	1.53462e-11
Glyceric acid	C00258	907.456	HMDB0000139	Carbohydrates and carbohydrate conjugates	1.78987	9.87003e-12
Cholesterol	C00187	811.46	HMDB0000067	Cholestane steroids	1.73749	3.08314e-09
Dihydrocholesterol	C12978	740.62	HMDB0001569	Cholestane steroids	1.72392	2.95442e-08
Inulotriose	C01355	851.28	HMDB0003539	Carbohydrates and carbohydrate conjugates	1.693	3.98503e-08
Delta-tocopherol	C14151	475.381	HMDB0002902	Quinone and hydroquinone lipids	1.68664	1.0015e-07
5-aminovaleric acid	C00431	843.805	HMDB0003355	Amino acids, peptides, and analogues	1.64932	2.12176e-07
Chlorogenic acid	C00852	803.726	HMDB0003164	Alcohols and polyols	1.64297	6.23725e-07
5-methoxytryptamine	C05659	918.188	HMDB0004095	Tryptamines and derivatives	1.63842	9.30754e-07
L-threonine	C00188	993.681	HMDB0000167	Amino acids, peptides, and analogues	1.61777	1.94911e-06
Dihydroxyacetone	C00184	852.506	HMDB0001882	Carbohydrates and carbohydrate conjugates	1.61327	3.03435e-06
Gamma-aminobutyric acid	C00334	858.166	HMDB0000112	Amino acids, peptides, and analogues	1.60724	2.74833e-07
Deoxycholic acid	C04483	773.254	HMDB0000626	Bile acids, alcohols and derivatives	1.58468	1.69458e-05
L-isoleucine	C00407	959.413	HMDB0000172	Amino acids, peptides, and analogues	1.57894	8.92162e-06
N-methylalanine	C02721	889.75	HMDB0094692	Amino acids, peptides, and analogues	1.56811	1.17476e-06
Malonic acid	C04025	780.554	HMDB0000691	Dicarboxylic acids and derivatives	1.55774	2.15612e-05
4a-carbinolamine tetrahydrobiopterin	C00268	758.206	HMDB0002215	Pterins and derivatives	1.54932	1.91783e-05
Galactinol	C01235	876.163	HMDB0005826	Carbohydrates and carbohydrate conjugates	1.53608	6.64914e-05
Galactose	C00984	986.105	HMDB0000143	Carbohydrates and carbohydrate conjugates	1.51563	2.32992e-05
